# Supplementary material for: Palladium complexes with Pd→B dative bonds: Analysis of the bonding in the palladaboratrane compound [κ4-B(mimBut)3]Pd(PMe3)
Source: Royal Society of Chemistry journal article supplement (doi:10.1039/b611654j), 2006-01-01
Supplement: b611654j.pdf [file b611654j.pdf]

## SUPPORTING INFORMATION

### Palladium Complexes with Pd→B Dative Bonds: Analysis of the Bonding in the Palladaboratrane Compound [ $\kappa^4$ -B(mim<sup>Bu<sup>t</sup></sup>)<sub>3</sub>]Pd(PMe<sub>3</sub>)

Keliang Pang, Stephanie M. Quan and Gerard Parkin,\*

*Department of Chemistry,*

*Columbia University,*

*New York, New York 10027, USA.*

---

#### EXPERIMENTAL SECTION

##### General Considerations

All manipulations were performed using a combination of dry glovebox, high vacuum, and Schlenk techniques under a nitrogen or argon atmosphere unless otherwise specified.<sup>1</sup> Solvents were purified and degassed by standard procedures. <sup>1</sup>H NMR spectra were measured on Bruker 300 DRX, Bruker 400 DRX, and Bruker Avance 500 DMX spectrometers. <sup>1</sup>H chemical shifts are reported in ppm relative to SiMe<sub>4</sub> (δ = 0) and were referenced internally with respect to the protio solvent impurity (δ 7.16 for C<sub>6</sub>D<sub>5</sub>H; 1.94 for CD<sub>2</sub>HN).<sup>2</sup> <sup>13</sup>C NMR spectra are reported in ppm relative to SiMe<sub>4</sub> (δ = 0) and were referenced internally with respect to the solvent (δ 1.32 for CD<sub>3</sub>CN).<sup>2</sup> <sup>31</sup>P chemical shifts are reported in ppm relative to 85% H<sub>3</sub>PO<sub>4</sub> (δ = 0) and were referenced

using  $\text{P}(\text{OMe})_3$  in  $\text{C}_6\text{D}_6$  ( $\delta = 141.0$ ) as external standard.  $^{11}\text{B}$  NMR spectra are reported with reference to  $\text{BF}_3(\text{OEt}_2)$  ( $\delta = 0.0$ ). Coupling constants are given in hertz. Infrared spectra were recorded on Nicolet Avatar 370 DTGS spectrometer and are reported in  $\text{cm}^{-1}$ . Mass spectra were obtained on a Micromass Quadrupole-Time-of-Flight mass spectrometer using fast atom bombardment (FAB).  $[\text{Tm}^{\text{But}}]\text{K}$  was prepared by a method analogous to that used for  $[\text{Tm}^{\text{But}}]\text{Na}$ .<sup>3</sup>  $\text{Pd}(\text{OAc})_2$  was obtained from Aldrich and Janssen Chimica and used as received.

### X-ray structure determinations

X-ray diffraction data were collected on a Bruker P4 diffractometer equipped with a SMART CCD detector and crystal data, data collection and refinement parameters are summarized in Table 1. The structures were solved using direct methods and standard difference map techniques, and were refined by full-matrix least-squares procedures on  $F^2$  with SHELXTL (Version 5.10).<sup>4</sup>

### Computational Details

All calculations were carried out using DFT as implemented in the Jaguar 6.5 suite of *ab initio* quantum chemistry programs.<sup>5</sup> Geometry optimizations were performed with the B3LYP density functional<sup>6</sup> and the 6-31G\*\* (C, H, N, B, P and S) and LACVP (Pd)<sup>7</sup> basis sets. Cartesian coordinates for geometry optimized structures are listed in Table 2. Molecular orbital analyses were performed with the aid of Jimp 2,<sup>8</sup> which employs Fenske-Hall calculations<sup>9</sup> and visualization using MOPLOT.<sup>10</sup>

### Synthesis of $[\kappa^4\text{-B}(\text{mim}^{\text{But}})_3]\text{Pd}(\text{PMe}_3)$

A solution of  $[\text{Tm}^{\text{But}}]\text{K}$  (227 mg, 0.44 mmol) in MeCN (2 mL) was treated with a suspension of  $\text{Pd}(\text{OAc})_2$  (100 mg, 0.44 mmol) in MeCN (6 mL) resulting in the formation of a yellow precipitate in a red solution. The mixture was stirred for 15 minutes and then filtered. The precipitate was suspended in benzene (15 mL) and treated with  $\text{PMe}_3$

(ca. 0.1 mL, 1.5 mmol). The mixture was heated at 60°C for 15 minutes, thereby giving an orange solution. The mixture was filtered and the volatile components were removed from the filtrate by lyophilization to give  $[\kappa^4\text{-B(mim}^{\text{Bu}^t})_3]\text{Pd(PMe}_3)$  as an orange solid (205 mg, 71 %). Crystals of composition  $[\kappa^4\text{-B(mim}^{\text{Bu}^t})_3]\text{Pd(PMe}_3)\cdot\text{C}_6\text{H}_6$  suitable for X-ray diffraction were grown by slow evaporation of a benzene solution. Anal. calcd. for  $\text{C}_{24}\text{H}_{42}\text{BN}_6\text{PPdS}_3\cdot(\text{C}_6\text{H}_6)_{0.8}$ : C, 47.9%; H, 6.5%; N, 11.6%. Found: C, 47.6%; H, 6.7%; N, 11.7%.  $^1\text{H NMR (C}_6\text{D}_6)$ : 1.06 [d,  $^2J_{\text{P-H}} = 4$  Hz, 9H,  $\text{PMe}_3$ ], 1.41 [s, 27H, 3  $\text{Bu}^t$ ], 6.41 [br, 3H, 3  $\text{CH}_{\text{mim}^{\text{Bu}^t}}$ ], 8.19 [br, 3H, 3  $\text{CH}_{\text{mim}^{\text{Bu}^t}}$ ].  $^1\text{H NMR (CD}_3\text{CN)}$ : 1.17 [d,  $^2J_{\text{P-H}} = 5$  Hz, 9H,  $\text{PMe}_3$ ], 1.70 [s, 27H, 3  $\text{Bu}^t$ ], 6.82 [d,  $^3J_{\text{H-H}} = 2$  Hz, 3H, 3  $\text{CH}_{\text{mim}^{\text{Bu}^t}}$ ], 7.01 [d,  $^3J_{\text{H-H}} = 2$  Hz, 3H, 3  $\text{CH}_{\text{mim}^{\text{Bu}^t}}$ ].  $^{13}\text{C}\{^1\text{H}\}$  NMR ( $\text{CD}_3\text{CN}$ ): 16.6 [d,  $^1J_{\text{P-C}} = 11$  Hz,  $\text{PMe}_3$ ], 28.4 [s, 3  $\text{C}(\text{CH}_3)_3$ ], 58.8 [s, 3  $\text{C}(\text{CH}_3)_3$ ], 117.7 [s, 3  $\text{CH}_{\text{mim}^{\text{Bu}^t}}$ ], 120.3 [s, 3  $\text{CH}_{\text{mim}^{\text{Bu}^t}}$ ], not observed [s, 3  $\text{CS}_{\text{mim}^{\text{Bu}^t}}$ ].  $^{31}\text{P}\{^1\text{H}\}$  NMR ( $\text{CD}_3\text{CN}$ ): -34.4 [br 1:1:1:1 q,  $^2J_{\text{B-P}} = 116$  Hz,  $\text{PMe}_3$ ].  $^{11}\text{B}\{^1\text{H}\}$  NMR ( $\text{CD}_3\text{CN}$ ): 4.4 [d,  $^2J_{\text{B-P}} = 116$  Hz,  $\text{B(mim}^{\text{Bu}^t})_3$ ]. IR Data (KBr pellet,  $\text{cm}^{-1}$ ): 3600~3100 (br), 2966 (br), 2917 (s), 2849 (m), 1379 (s), 1367 (m), 1186 (s), 1157 (s), 1097 (s, br), 1062 (s), 1024 (m), 949 (m), 762 (m), 719 (m), 685 (m), 469 (s).

### Synthesis of $\{[\mu\text{-}\kappa^1,\kappa^3\text{-B(mim}^{\text{Bu}^t})_3]\text{Pd}\}_2$

A solution of  $[\text{Tm}^{\text{Bu}^t}]\text{K}$  (227 mg, 0.44 mmol) in MeCN (3 mL) was treated with a solution of  $\text{Pd(OAc)}_2$  (100 mg, 0.44 mmol) in MeCN (9 mL) resulting in the formation of a yellow precipitate in a red solution. The mixture was stirred for 15 minutes and then filtered. The precipitate was washed with MeOH/ $\text{H}_2\text{O}$  (10 mL of a 1:1 mixture), THF (2  $\times$  5mL), Et<sub>2</sub>O (2  $\times$  5mL) and dried *in vacuo* to give  $\{[\mu\text{-}\kappa^1,\kappa^3\text{-B(mim}^{\text{Bu}^t})_3]\text{Pd}\}_2$  as a yellow solid (119 mg, 46 %). Crystals suitable for X-ray diffraction were grown by slow evaporation of an acetonitrile solution. Anal. calcd. for  $\text{C}_{42}\text{H}_{66}\text{B}_2\text{N}_{12}\text{Pd}_2\text{S}_6$ : C, 43.3%; H, 5.7%; N, 14.4%. Found: C, 42.3%; H, 5.7%; N, 13.9%.  $^1\text{H NMR (CD}_3\text{CN, 300K)}$ : 1.70 [s, 27H, 3  $\text{Bu}^t$ ], 6.94 [s, br, 3 $\text{CH}_{\text{mim}^{\text{Bu}^t}}$ ], not observed [3 $\text{CH}_{\text{mim}^{\text{Bu}^t}}$ ].  $^1\text{H NMR (CD}_3\text{CN, 228K)}$ : 1.59 [br, 9H, 1 $\text{Bu}^t$ ], 1.66 [br, 9 H, 1 $\text{Bu}^t$ ], 1.72 [br, 9H, 1 $\text{Bu}^t$ ], 5.25 [br, 1H, 1 $\text{CH}_{\text{mim}^{\text{Bu}^t}}$ ], 6.32 [br, 1 H, 1 $\text{CH}_{\text{mim}^{\text{Bu}^t}}$ ], 6.62 [br, 1 H, 1 $\text{CH}_{\text{mim}^{\text{Bu}^t}}$ ], 6.76 [br, 1H, 1 $\text{CH}_{\text{mim}^{\text{Bu}^t}}$ ], 6.98 [br, 1H, 1 $\text{CH}_{\text{mim}^{\text{Bu}^t}}$ ]

mim<sup>Bu<sup>t</sup></sup>], 7.07 [br, 1H, CH\_mim<sup>Bu<sup>t</sup></sup>]. IR Data (KBr pellet, cm<sup>-1</sup>): 3600~3200 (br), 2975 (w), 2920 (w), 1398 (m), 1383 (s), 1365 (m), 1348 (s), 1264 (w), 1190 (s), 1158 (s), 1061 (m), 821 (w), 794 (w), 770 (w), 746 (w), 714 (w), 669 (w), 472 (w). Mass spectrum:  $m/z = 1166.4$  {M}<sup>+</sup>.

### Synthesis of [κ<sup>2</sup>-AcOB(mim<sup>Bu<sup>t</sup></sup>)<sub>3</sub>]<sub>2</sub>Pd

A solution of [Tm<sup>Bu<sup>t</sup></sup>]<sup>+</sup>K<sup>-</sup> (23 mg, 0.04 mmol) in MeCN (0.5 mL) was treated with a solution of Pd(OAc)<sub>2</sub> (10 mg, 0.04 mmol) in MeCN (1 mL) resulting in the formation of a yellow precipitate in a red solution. The mixture was stirred for 15 minutes and then filtered. The precipitate was suspended in MeCN (0.5 mL) and treated with a solution of I<sub>2</sub> (11 mg, 0.04 mmol) in MeCN (0.5 mL). The resulting dark red solution was filtered and allowed to crystallize at ambient temperature. Red crystals formed over a period of two days (3 mg, 13%). Anal. calcd. for C<sub>46</sub>H<sub>72</sub>B<sub>2</sub>N<sub>12</sub>O<sub>4</sub>PdS<sub>6</sub>•CH<sub>3</sub>CN : C, 47.3 %; H, 6.2 %; N, 14.9 %. Found: C, 46.8 %; H, 5.8 %; N, 15.2 %. IR Data (KBr pellet, cm<sup>-1</sup>): 3188 (w), 3156 (w), 3110 (w), 2979 (m), 2926 (m), 1712 (m), 1562 (w), 1407 (m), 1358 (s), 1335 (m), 1266 (s), 1197 (m), 1167 (m), 1079 (m), 1036 (m), 825 (m), 809 (m), 792 (m), 747 (w), 664 (m).

**Table 1.** Crystal, intensity collection and refinement data.

|                                                | $\{[\mu\text{-}\kappa^1, \kappa^3\text{-B(mim}^{\text{Bu}^t})_3]\text{Pd}\}_2$<br>$2\text{CH}_3\text{CN}$ | $[\kappa^4\text{-B(mim}^{\text{Bu}^t})_3]\text{Pd(PMe}_3)$<br>$\text{C}_6\text{H}_6$ |
|------------------------------------------------|-----------------------------------------------------------------------------------------------------------|--------------------------------------------------------------------------------------|
| Lattice                                        | Monoclinic                                                                                                | Monoclinic                                                                           |
| Formula                                        | $\text{C}_{46}\text{H}_{72}\text{B}_2\text{N}_{14}\text{Pd}_2\text{S}_6$                                  | $\text{C}_{30}\text{H}_{48}\text{BN}_6\text{PPdS}_3$                                 |
| formula weight                                 | 1247.96                                                                                                   | 737.10                                                                               |
| space group                                    | $P2_1/c$                                                                                                  | $P2_1/n$                                                                             |
| $a/\text{\AA}$                                 | 12.6473(6)                                                                                                | 13.5495(14)                                                                          |
| $b/\text{\AA}$                                 | 18.2555(9)                                                                                                | 13.3193(13)                                                                          |
| $c/\text{\AA}$                                 | 12.4059(6)                                                                                                | 21.005(2)                                                                            |
| $\alpha/^\circ$                                | 90                                                                                                        | 90                                                                                   |
| $\beta/^\circ$                                 | 101.6250(10)                                                                                              | 108.513(2)                                                                           |
| $\gamma/^\circ$                                | 90                                                                                                        | 90                                                                                   |
| $V/\text{\AA}^3$                               | 2805.6(2)                                                                                                 | 3594.6(6)                                                                            |
| $Z$                                            | 2                                                                                                         | 4                                                                                    |
| temperature (K)                                | 243                                                                                                       | 243                                                                                  |
| Radiation ( $\lambda$ , $\text{\AA}$ )         | 0.71073                                                                                                   | 0.71073                                                                              |
| $\rho$ (calcd.), $\text{g cm}^{-3}$            | 1.477                                                                                                     | 1.362                                                                                |
| $\mu$ (Mo $\text{K}\alpha$ ), $\text{mm}^{-1}$ | 0.911                                                                                                     | 0.764                                                                                |
| $\theta$ max, deg.                             | 28.35                                                                                                     | 28.30                                                                                |
| no. of data                                    | 6611                                                                                                      | 8406                                                                                 |
| no. of parameters                              | 317                                                                                                       | 379                                                                                  |
| $R_1$                                          | 0.0425                                                                                                    | 0.0667                                                                               |
| $wR_2$                                         | 0.0870                                                                                                    | 0.1434                                                                               |
| GOF                                            | 1.005                                                                                                     | 1.012                                                                                |

|                                          | $[\kappa^2\text{-AcOB(mim}^{\text{Bu}^t})_3]_2\text{Pd}$<br>2CH <sub>3</sub> CN                | $[\kappa^2\text{-AcOB(mim}^{\text{Bu}^t})_3]_2\text{Pd}$<br>2CH <sub>3</sub> CN                |
|------------------------------------------|------------------------------------------------------------------------------------------------|------------------------------------------------------------------------------------------------|
| Lattice                                  | Monoclinic                                                                                     | Triclinic                                                                                      |
| Formula                                  | C <sub>50</sub> H <sub>78</sub> B <sub>2</sub> N <sub>14</sub> O <sub>4</sub> PdS <sub>6</sub> | C <sub>50</sub> H <sub>78</sub> B <sub>2</sub> N <sub>14</sub> O <sub>4</sub> PdS <sub>6</sub> |
| formula weight                           | 1259.64                                                                                        | 1259.64                                                                                        |
| space group                              | <i>P2<sub>1</sub>/c</i>                                                                        | <i>P-1</i>                                                                                     |
| <i>a</i> /Å                              | 10.7707(5)                                                                                     | 10.8342(4)                                                                                     |
| <i>b</i> /Å                              | 16.3500(8)                                                                                     | 11.2770(5)                                                                                     |
| <i>c</i> /Å                              | 18.0972(9)                                                                                     | 13.6177(6)                                                                                     |
| $\alpha$ /°                              | 90                                                                                             | 93.8670(10)                                                                                    |
| $\beta$ /°                               | 99.8880(10)                                                                                    | 92.8400(10)                                                                                    |
| $\gamma$ /°                              | 90                                                                                             | 106.2340(10)                                                                                   |
| <i>V</i> /Å <sup>3</sup>                 | 3139.6(3)                                                                                      | 1589.73(12)                                                                                    |
| <i>Z</i>                                 | 2                                                                                              | 1                                                                                              |
| temperature (K)                          | 243                                                                                            | 243                                                                                            |
| Radiation ( $\lambda$ , Å)               | 0.71073                                                                                        | 0.71073                                                                                        |
| $\rho$ (calcd.), g cm <sup>-3</sup>      | 1.332                                                                                          | 1.316                                                                                          |
| $\mu$ (Mo K $\alpha$ ), mm <sup>-1</sup> | 0.547                                                                                          | 0.541                                                                                          |
| $\theta$ max, deg.                       | 28.30                                                                                          | 28.32                                                                                          |
| no. of data                              | 7407                                                                                           | 7200                                                                                           |
| no. of parameters                        | 351                                                                                            | 350                                                                                            |
| <i>R</i> <sub>1</sub>                    | 0.0420                                                                                         | 0.0354                                                                                         |
| <i>wR</i> <sub>2</sub>                   | 0.1108                                                                                         | 0.0852                                                                                         |
| GOF                                      | 1.030                                                                                          | 1.011                                                                                          |

**Table 2.** Cartesian Coordinated for Geometry Optimized Structures

**$[\kappa^4\text{-B(mim}^{\text{Bu}^t})_3]\text{Pd(PMe}_3\text{)} (\text{C3v})$**   
**-2956.61709126372 Hartrees**

| <b>atom</b> | <b>x</b>      | <b>y</b>      | <b>z</b>      |
|-------------|---------------|---------------|---------------|
| Pd1         | 0.0000000000  | 0.0000000000  | 1.2728178788  |
| P2          | 0.0000000000  | 0.0000000000  | 3.7695635605  |
| S3          | -1.2628261129 | 2.1872789886  | 1.0931464958  |
| S4          | -1.2628261129 | -2.1872789886 | 1.0931464958  |
| S5          | 2.5256522258  | 0.0000000000  | 1.0931464958  |
| N6          | -1.8535235850 | 3.2103970222  | -1.4503939609 |
| N7          | -0.7434741892 | -1.2877350699 | -1.4007624440 |
| N8          | -1.8535235850 | -3.2103970222 | -1.4503939609 |
| N9          | 1.4869483785  | 0.0000000000  | -1.4007624440 |
| N10         | 3.7070471700  | 0.0000000000  | -1.4503939609 |
| N11         | -0.7434741892 | 1.2877350699  | -1.4007624440 |
| B12         | 0.0000000000  | 0.0000000000  | -0.8258810580 |
| C13         | -1.3027032231 | 2.2563481696  | -0.6144240704 |
| C14         | -0.9491179755 | 1.6439205560  | -2.7284754575 |
| C15         | -1.6230879727 | 2.8112708338  | -2.7664041160 |
| C16         | -2.5937123673 | 4.4924416004  | -1.1898646062 |
| C17         | -2.7759123883 | 4.8080212940  | 0.3005423718  |
| C18         | -1.7888562311 | 5.6394330228  | -1.8374571077 |
| C19         | -3.9894641451 | 4.3689114512  | -1.8374571077 |
| C20         | -1.3027032231 | -2.2563481696 | -0.6144240704 |

|     |               |               |               |
|-----|---------------|---------------|---------------|
| C21 | -0.9491179755 | -1.6439205560 | -2.7284754575 |
| C22 | -1.6230879727 | -2.8112708338 | -2.7664041160 |
| C23 | -2.5937123673 | -4.4924416004 | -1.1898646062 |
| C24 | -2.7759123883 | -4.8080212940 | 0.3005423718  |
| C25 | -3.9894641451 | -4.3689114512 | -1.8374571077 |
| C26 | -1.7888562311 | -5.6394330228 | -1.8374571077 |
| C27 | 2.6054064462  | 0.0000000000  | -0.6144240704 |
| C28 | 1.8982359510  | 0.0000000000  | -2.7284754575 |
| C29 | 3.2461759453  | 0.0000000000  | -2.7664041160 |
| C30 | 5.1874247346  | 0.0000000000  | -1.1898646062 |
| C31 | 5.5518247767  | 0.0000000000  | 0.3005423718  |
| C32 | 5.7783203762  | -1.2705215716 | -1.8374571077 |
| C33 | 5.7783203762  | 1.2705215716  | -1.8374571077 |
| C34 | 0.8294841478  | 1.4367086880  | 4.5959223664  |
| C35 | -1.6589682956 | 0.0000000000  | 4.5959223664  |
| C36 | 0.8294841478  | -1.4367086880 | 4.5959223664  |
| H37 | -0.6070282086 | 1.0514036989  | -3.5574429747 |
| H38 | -1.9560115710 | 3.3879114212  | -3.6127109970 |
| H39 | -0.6070282086 | -1.0514036989 | -3.5574429747 |
| H40 | -1.9560115710 | -3.3879114212 | -3.6127109970 |
| H41 | 1.2140564172  | 0.0000000000  | -3.5574429747 |
| H42 | 3.9120231421  | 0.0000000000  | -3.6127109970 |
| H43 | 0.3435704950  | 2.3619977327  | 4.2729902371  |



|     |               |               |               |
|-----|---------------|---------------|---------------|
| H44 | 0.7915950452  | 1.3710828373  | 5.6894430487  |
| H45 | 1.8737647927  | 1.4785396430  | 4.2729902371  |
| H46 | -2.2173352877 | 0.8834580897  | 4.2729902371  |
| H47 | -2.2173352877 | -0.8834580897 | 4.2729902371  |
| H48 | -1.5831900904 | 0.0000000000  | 5.6894430487  |
| H49 | 0.3435704950  | -2.3619977327 | 4.2729902371  |
| H50 | 1.8737647927  | -1.4785396430 | 4.2729902371  |
| H51 | 0.7915950452  | -1.3710828373 | 5.6894430487  |
| H52 | -1.8220414810 | 4.9194334100  | 0.8165585667  |
| H53 | -3.3227738069 | 5.7552130557  | 0.3680056880  |
| H54 | -3.3493335648 | 4.0376509143  | 0.8165585667  |
| H55 | -1.6739924445 | 5.5114581269  | -2.9176788981 |
| H56 | -2.3024137452 | 6.5910105407  | -1.6681342881 |
| H57 | -0.7911616657 | 5.7035523712  | -1.3931371116 |
| H58 | -3.9360665275 | 4.2054490461  | -2.9176788981 |
| H59 | -4.5438404124 | 3.5369422866  | -1.3931371116 |
| H60 | -4.5567756923 | 5.2894540637  | -1.6681342881 |
| H61 | -1.8220414810 | -4.9194334100 | 0.8165585667  |
| H62 | -3.3493335648 | -4.0376509143 | 0.8165585667  |
| H63 | -3.3227738069 | -5.7552130557 | 0.3680056880  |
| H64 | -3.9360665275 | -4.2054490461 | -2.9176788981 |
| H65 | -4.5567756923 | -5.2894540637 | -1.6681342881 |
| H66 | -4.5438404124 | -3.5369422866 | -1.3931371116 |

|     |               |               |               |
|-----|---------------|---------------|---------------|
| H67 | -1.6739924445 | -5.5114581269 | -2.9176788981 |
| H68 | -0.7911616657 | -5.7035523712 | -1.3931371116 |
| H69 | -2.3024137452 | -6.5910105407 | -1.6681342881 |
| H70 | 5.1713750458  | 0.8817824957  | 0.8165585667  |
| H71 | 5.1713750458  | -0.8817824957 | 0.8165585667  |
| H72 | 6.6455476139  | 0.0000000000  | 0.3680056880  |
| H73 | 5.6100589720  | -1.3060090808 | -2.9176788981 |
| H74 | 6.8591894375  | -1.3015564770 | -1.6681342881 |
| H75 | 5.3350020781  | -2.1666100846 | -1.3931371116 |
| H76 | 5.6100589720  | 1.3060090808  | -2.9176788981 |
| H77 | 5.3350020781  | 2.1666100846  | -1.3931371116 |
| H78 | 6.8591894375  | 1.3015564770  | -1.6681342881 |

**References**

- (1) (a) McNally, J. P.; Leong, V. S.; Cooper, N. J. in *Experimental Organometallic Chemistry*, Wayda, A. L.; Darensbourg, M. Y., Eds.; American Chemical Society: Washington, DC, 1987; Chapter 2, pp 6-23.  
(b) Burger, B.J.; Bercaw, J. E. in *Experimental Organometallic Chemistry*; Wayda, A. L.; Darensbourg, M. Y., Eds.; American Chemical Society: Washington, DC, 1987; Chapter 4, pp 79-98.  
(c) Shriver, D. F.; Drezdson, M. A.; *The Manipulation of Air-Sensitive Compounds*, 2<sup>nd</sup> Edition; Wiley-Interscience: New York, 1986.
- (2) Gottlieb, H. E.; Kotlyar, V.; Nudelman, A. J. *Org. Chem.* **1997**, *62*, 7512-7515.
- (3) Mihalcik, D. J.; White, J. L.; Tanski, J. M.; Zakharov, L. N.; Yap, G. P. A.; Incarvito, C. D.; Rheingold, A. L.; Rabinovich, D. *Dalton Trans.* **2004**, 1626-1634.
- (4) Sheldrick, G. M. SHELXTL, An Integrated System for Solving, Refining and Displaying Crystal Structures from Diffraction Data; University of Göttingen, Göttingen, Federal Republic of Germany, 1981.
- (5) Jaguar 6.5, Schrödinger, LLC, Portland, Oregon.
- (6) (a) Becke, A. D. *J. Chem. Phys.* **1993**, *98*, 5648-5652.  
(b) Becke, A. D. *Phys. Rev. A* **1988**, *38*, 3098-3100.  
(c) Lee, C. T.; Yang, W. T.; Parr, R. G. *Phys. Rev. B* **1988**, *37*, 785-789.  
(d) Vosko, S. H.; Wilk, L.; Nusair, M. *Can. J. Phys.* **1980**, *58*, 1200-1211.  
(e) Slater, J. C. *Quantum Theory of Molecules and Solids, Vol. 4: The Self-Consistent Field for Molecules and Solids*; McGraw-Hill: New York, 1974.
- (7) (a) Hay, P. J.; Wadt, W. R. *J. Chem. Phys.* **1985**, *82*, 270-283.  
(b) Wadt, W. R.; Hay, P. J. *J. Chem. Phys.* **1985**, *82*, 284-298.  
(c) Hay, P. J.; Wadt, W. R. *J. Chem. Phys.* **1985**, *82*, 299-310.

- (8) Manson, J. M. B.; Webster, C. E.; Hall, M. B. Jimp 2 Version 0.089 (2006);  
Department of Chemistry, Texas A&M University, College Station, TX 77842,  
(<http://www.chem.tamu.edu/jimp2/>).
- (9) Hall, M. B.; Fenske, R. F. *Inorg. Chem.* **1972**, *11*, 768-775.
- (10) Version 2.0, June 1993; Lichtenberger, D. L. Department of Chemistry, University  
of Arizona, Tuscon, AZ 85721.
